# Supplementary material for: A bifunctional sensor based on diarylethene for the colorimetric recognition of Cu2+ and fluorescence detection of Cd2+
Source: Royal Society of Chemistry journal article supplement (doi:10.1039/c9ra04965g), 2019-01-01
Supplement: c9ra04965g1.pdf [file c9ra04965g1.pdf]

## Supporting materials

### A bifunctional sensor based on dirylethene for colorimetric recognition of Cu<sup>2+</sup> and fluorescent detection of Cd<sup>2+</sup>

Shouyu Qiu, Mengmeng Lu, Shiqiang Cui\*, Zhen Wang, Shouzhi Pu\*

*Jiangxi Key Laboratory of Organic Chemistry, Jiangxi Science and Technology Normal University, Nanchang 330013, PR China*

\*Corresponding author: E-mail: [cuisq2006@163.com](mailto:cuisq2006@163.com) (S. Cui); [pushouzhi@tsinghua.org.cn](mailto:pushouzhi@tsinghua.org.cn) (S. Pu); Tel./Fax: +86-791-83831996.

### Contents

**Table S1.** Comparative study of the analytical performance of **1o** with other reported sensors.

**Fig. S1.** <sup>1</sup>H NMR spectrum of **1o**.

**Fig. S2.** <sup>13</sup>C NMR spectrum of **1o**.

**Fig. S3.** ESI-MS spectrum of **1o**.

**Fig. S4.** Changes in the absorption and color of **1o** ( $2.0 \times 10^{-5}$  mol L<sup>-1</sup>) upon irradiation with UV/vis lights in THF.

**Fig. S5.** Competitive tests for the absorption response of **1o** in the presence of Cu<sup>2+</sup> and other competing metal ions in THF. Black bars represent the absorptions of **1o** solution in the presence of 1.0 equiv. metal ions and red bars represent the absorptions of **1o** solutions containing the metal ions and Cu<sup>2+</sup> ( $2.0 \times 10^{-5}$  mol L<sup>-1</sup>).

**Fig. S6.** The absorbance at 413 nm versus the concentration of Cu<sup>2+</sup>.

**Fig. S7.** Absorption spectra and color changes of **1c** in THF ( $2.0 \times 10^{-5}$  mol L<sup>-1</sup>) with the addition of Cu<sup>2+</sup>.

**Fig. S8.** Competitive tests for the fluorescence responses of **1o** in the presence of Cd<sup>2+</sup> and other competing metal ions in THF. Black bars represent the emission intensities of **1o** solutions in the presence of 4.0 equiv. metal ions and red bars represent the emission intensities of **1o** solutions containing the metal ions and Cd<sup>2+</sup> ( $2.0 \times 10^{-5}$  mol L<sup>-1</sup>).

**Fig. S9.** The emission intensity at 470 nm versus the concentration of Cd<sup>2+</sup>.

**Fig. S10.** Fluorescence spectra and color changes of **1c** ( $2.0 \times 10^{-5}$  mol L<sup>-1</sup>) induced by Cd<sup>2+</sup> (0 - 4.0 equiv.) in THF.

**Fig. S11.** ESI-MS spectrum of **1o**-Cu<sup>2+</sup>.

**Fig. S12.** The limit of detection (LOD) for Cu<sup>2+</sup> is  $8.36 \times 10^{-8}$  mol L<sup>-1</sup>.

**Fig. S13.** ESI-MS spectrum of **1o**-Cd<sup>2+</sup>.

**Fig. S14.** The limit of detection (LOD) for Cd<sup>2+</sup> is  $1.71 \times 10^{-7}$  mol L<sup>-1</sup>.

**Fig. S15.** IR spectra of **1o**, **1o**-Cu<sup>2+</sup> and **1o**-Cd<sup>2+</sup> in KBr disks.

**Fig. S16.** The optimized structure of **1o**-Cu<sup>2+</sup> and **1o**-Cd<sup>2+</sup>.

**Table S1.** Comparative study of the analytical performance of **1o** with other reported sensors.

| Structure of sensors                                                                | LOD                                     |                                         | Approaches                                                             | Ref.      |
|-------------------------------------------------------------------------------------|-----------------------------------------|-----------------------------------------|------------------------------------------------------------------------|-----------|
|                                                                                     | Cu <sup>2+</sup> (mol L <sup>-1</sup> ) | Cd <sup>2+</sup> (mol L <sup>-1</sup> ) |                                                                        |           |
| 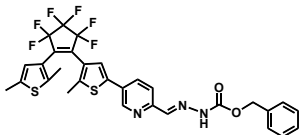   | $8.36 \times 10^{-8}$                   | $1.71 \times 10^{-7}$                   | Colorimetry for Cu <sup>2+</sup> /<br>Fluorometry for Cd <sup>2+</sup> | This work |
|    | $1.0 \times 10^{-6}$                    | -                                       | Colorimetry                                                            | 32        |
|    | $1.9 \times 10^{-7}$                    | -                                       | Colorimetry                                                            | 68        |
|    | $3.89 \times 10^{-6}$                   | -                                       | Colorimetry                                                            | 69        |
|   | $9.0 \times 10^{-7}$                    | -                                       | Colorimetry                                                            | 70        |
|  | -                                       | $5.57 \times 10^{-6}$                   | Fluorometry                                                            | 71        |
|  | -                                       | $6.5 \times 10^{-5}$                    | Fluorometry                                                            | 72        |
|  | -                                       | $2.165 \times 10^{-7}$                  | Fluorometry                                                            | 73        |
|  | -                                       | $2.76 \times 10^{-7}$                   | Fluorometry                                                            | 74        |
|  | $4.12 \times 10^{-8}$                   | $1.89 \times 10^{-7}$                   | Colorimetry for Cu <sup>2+</sup> /<br>Fluorometry for Cd <sup>2+</sup> | 41        |

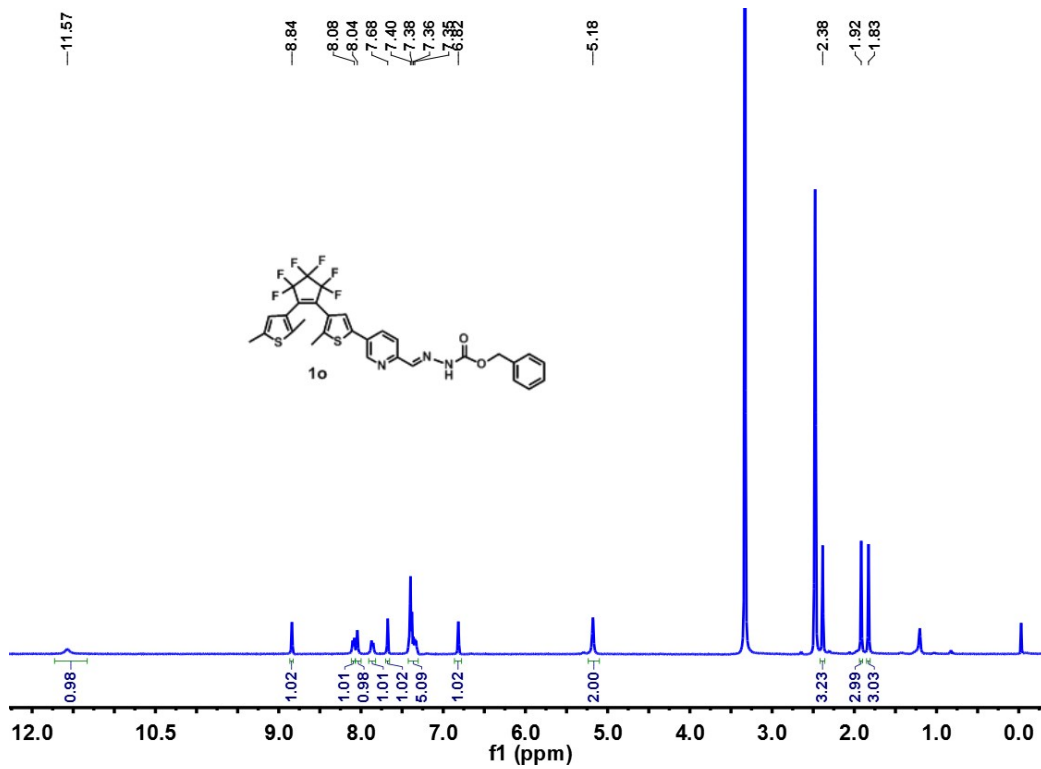

Fig. S1. <sup>1</sup>H NMR spectrum of **1o**.

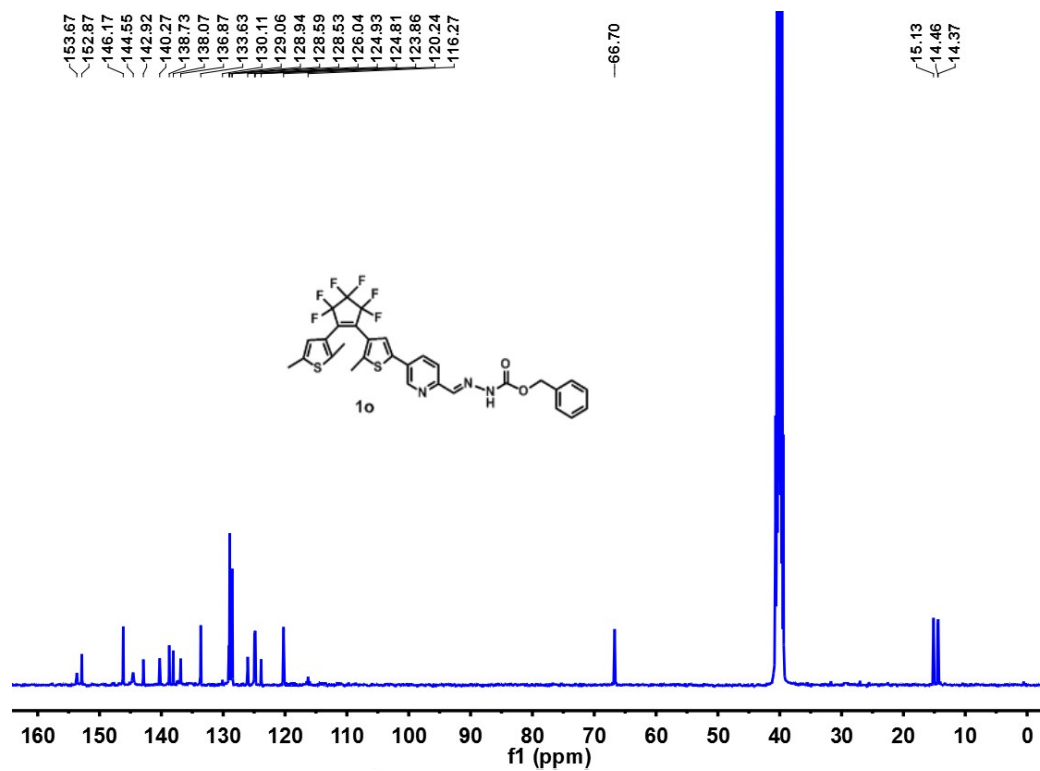

**Fig. S2.** <sup>13</sup>C NMR spectrum of **1o**.

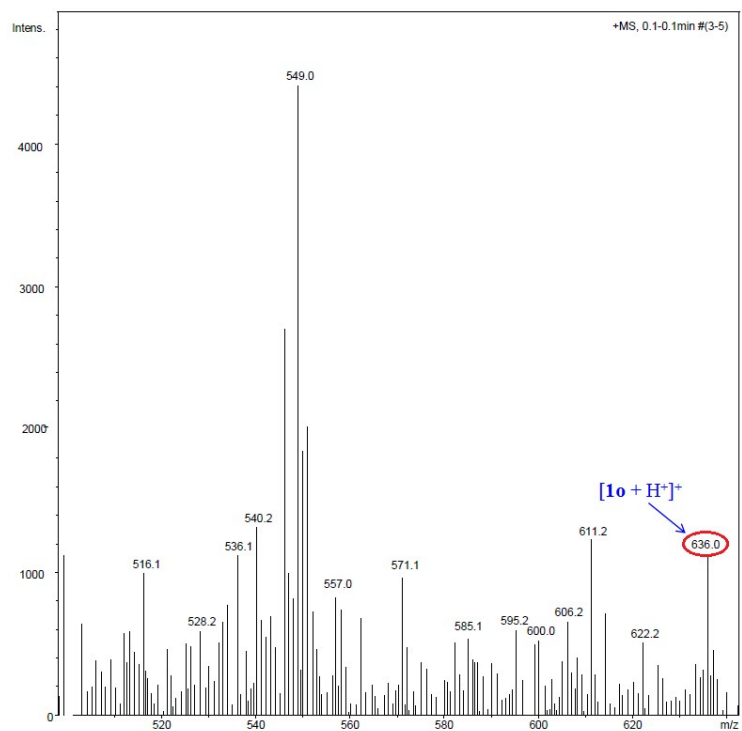

**Fig. S3.** ESI-MS spectrum of **10**.

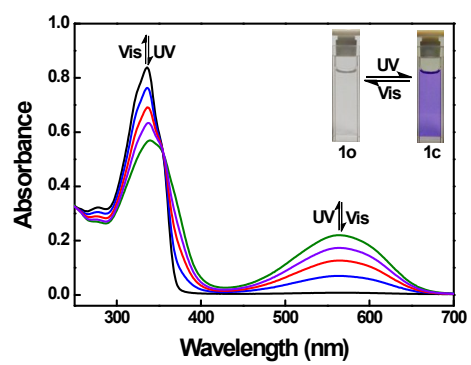

**Fig. S4.** Changes in the absorption and color of **1o** ( $2.0 \times 10^{-5}$  mol L<sup>-1</sup>) upon irradiation with UV/vis lights in THF.

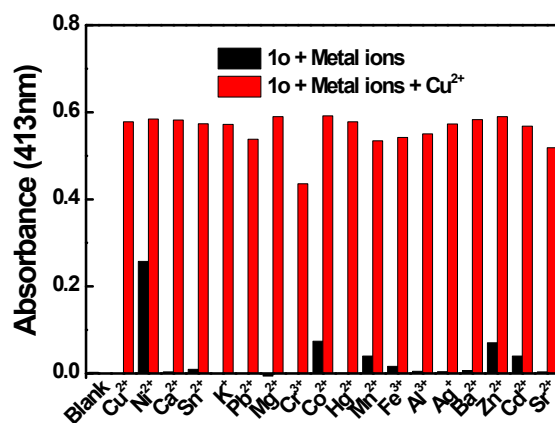

**Fig. S5.** Competitive tests for the absorption response of **1o** in the presence of Cu<sup>2+</sup> and other competing metal ions in THF. Black bars represent the absorptions of **1o** solutions in the presence of 1.0 equiv. metal ions and red bars represent the absorptions of **1o** solutions containing the metal ions and Cu<sup>2+</sup> ( $2.0 \times 10^{-5}$  mol L<sup>-1</sup>).



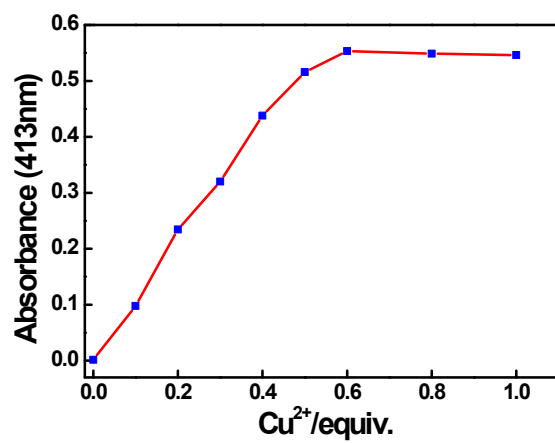

Fig. S6. The absorbance at 413 nm versus the concentration of Cu<sup>2+</sup>.

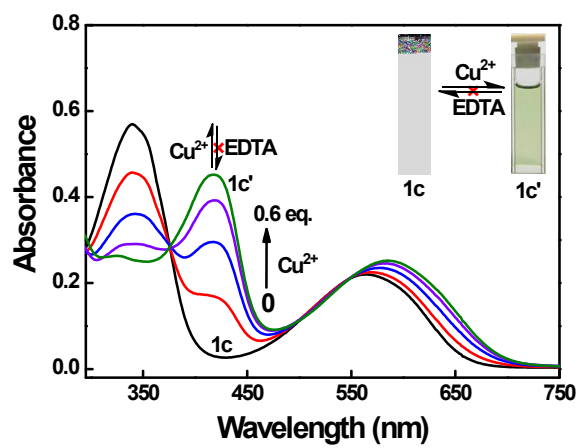

**Fig. S7.** Absorption spectra and color changes of **1c** in THF ( $2.0 \times 10^{-5}$  mol L<sup>-1</sup>) with the addition of Cu<sup>2+</sup>.

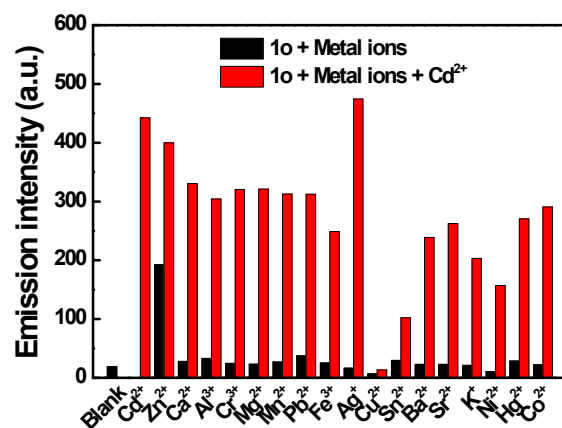

**Fig. 8.** Competitive tests for the fluorescence responses of **1o** in the presence of Cd<sup>2+</sup> and other competing metal ions in THF. Black bars represent the emission intensities of **1o** solutions in the presence of 4.0 equiv. metal ions and red bars represent the emission intensities of **1o** solutions containing the metal ions and Cd<sup>2+</sup> ( $2.0 \times 10^{-5}$  mol L<sup>-1</sup>).

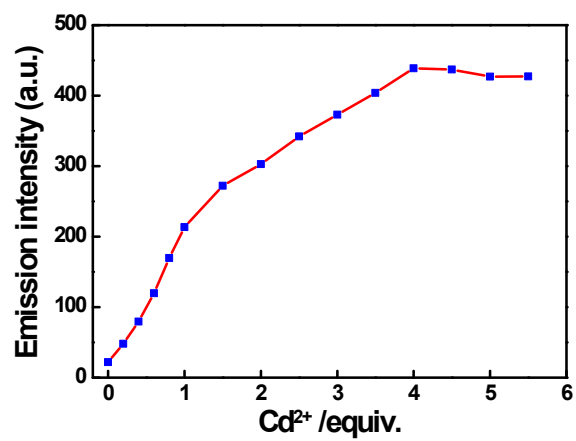

**Fig. S9.** The emission intensity at 470 nm versus the concentration of Cd<sup>2+</sup>.

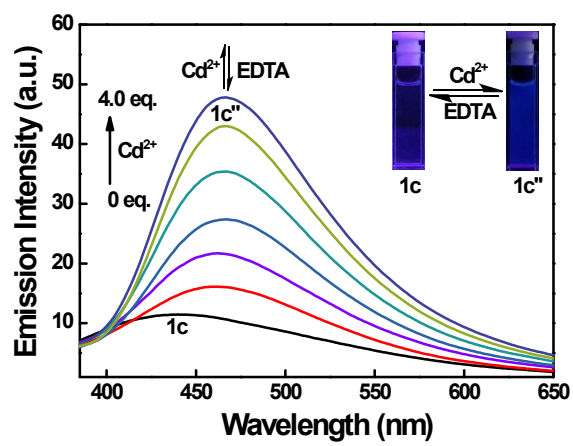

**Fig. S10.** Fluorescence spectra and color changes of **1c** ( $2.0 \times 10^{-5}$  mol L<sup>-1</sup> in THF) induced by

$\text{Cd}^{2+}$  (0 - 4.0 equiv.).

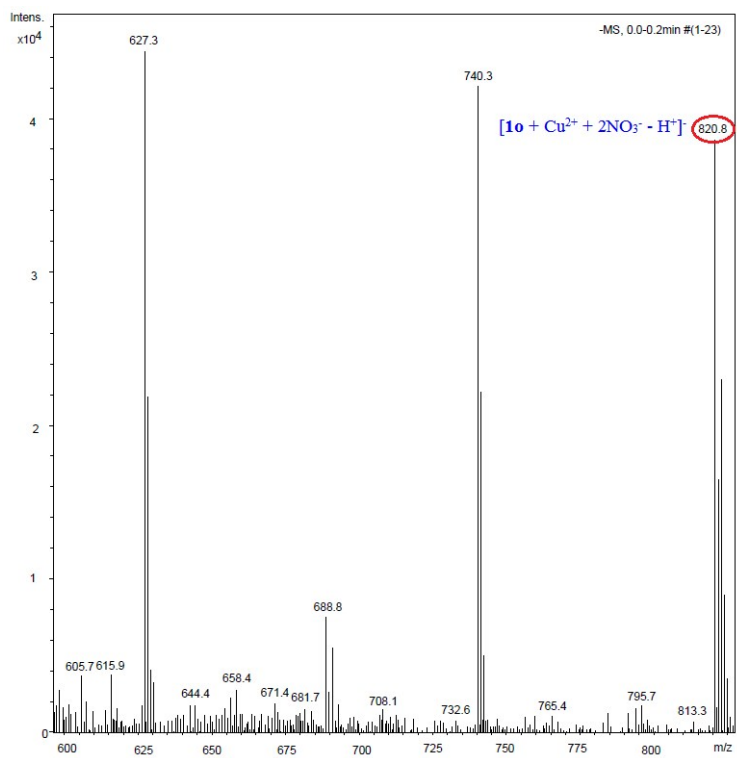

**Fig. S11.** ESI-MS spectrum of **10**-Cu<sup>2+</sup>.

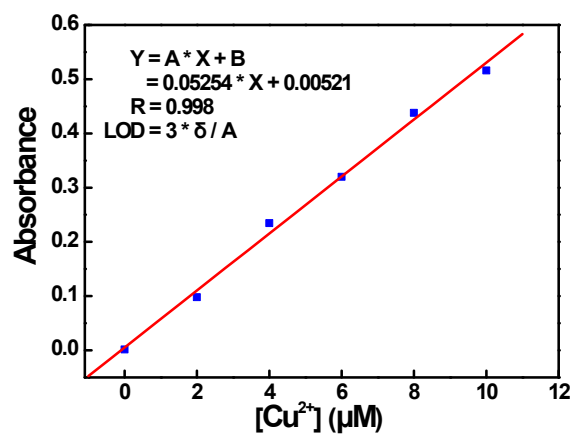

**Fig. S12.** The limit of detection (LOD) for Cu<sup>2+</sup> is  $8.36 \times 10^{-8}$  mol L<sup>-1</sup>.

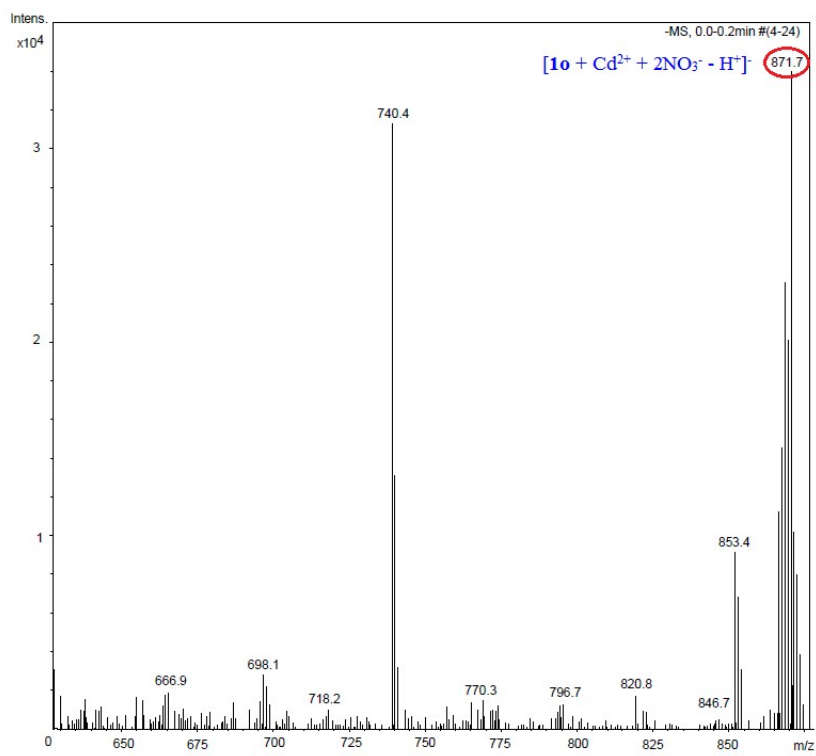

**Fig. S13.** ESI-MS spectrum of **10**-Cd<sup>2+</sup>.



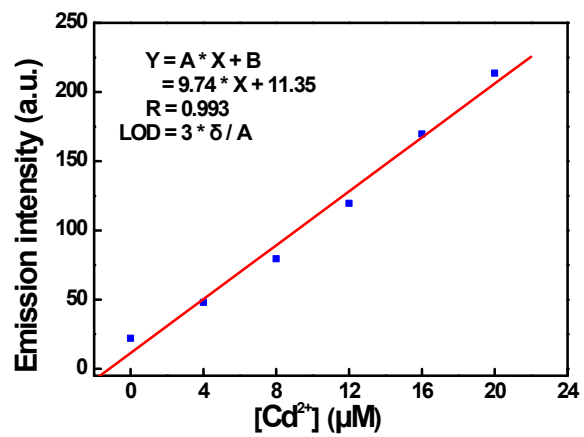

Fig. S14. The limit of detection (LOD) for Cd<sup>2+</sup> is  $1.71 \times 10^{-7}$  mol L<sup>-1</sup>.

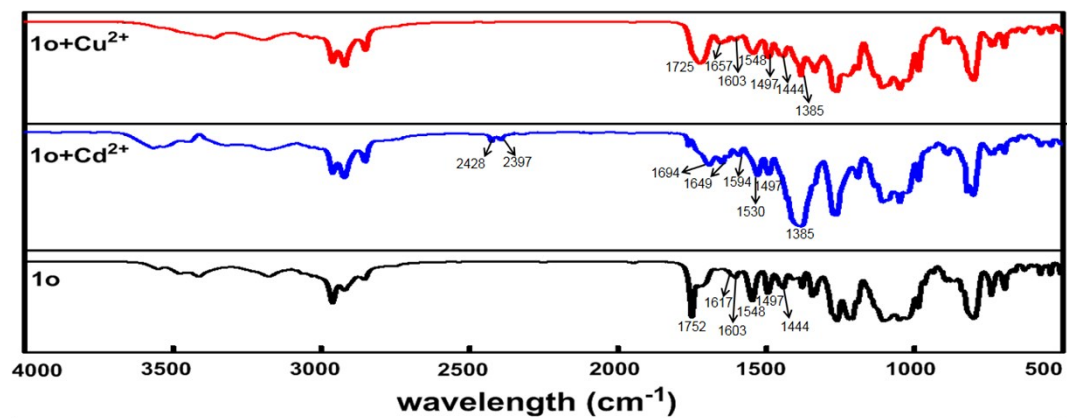

Fig. S15. IR spectra of **1o**, **1o-Cu<sup>2+</sup>** and **1o-Cd<sup>2+</sup>** in KBr disks.

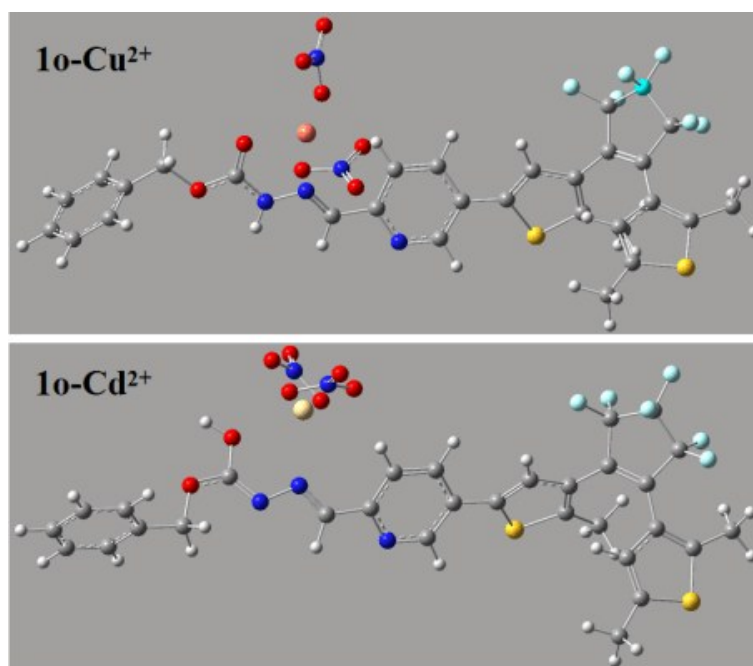

**Fig. S16.** The optimized structure of **10-Cu<sup>2+</sup>** and **10-Cd<sup>2+</sup>**.
